## Lipoamide dehydrogenase mediates retention of coronin-1 on BCG vacuoles, leading to arrest in phagosome maturation

Ala-Eddine Deghmane, Hafid Soualhine, Horacio Bach, Khalid Sendide, Saotomo Itoh, Andrea Tam, Sanaa Noubir, Amina Talal, Raymond Lo, Satoshi Toyoshima, Yossef Av-Gay and Zakaria Hmama

*Journal of Cell Science* 120, 3489 (2007) doi:10.1242/jcs.022335

There was an error published in *J. Cell Sci.* **120**, 2796-2806.

The second author's surname was spelled incorrectly. The correct name is Hafid Soualhine.
